# Supplementary material for: MCM-48 nanorods: a self-assembled isotropic cubic mesostructure with anisotropic morphology
Source: Royal Society of Chemistry journal article supplement (doi:10.1039/c2ra22444e), 2012-01-01
Supplement: c2ra22444e.pdf [file c2ra22444e.pdf]

**Electronic Supplementary Information**

**MCM-48 Nanorods: A Self-Assembled Isotropic Cubic  
Mesostructure with an Anisotropic Morphology**

*Albert Chang, Nien-Chu Lai and Chia-Min Yang\**

Department of Chemistry, National Tsing Hua University, Hsinchu 30013, Taiwan

## Experimental details

### Synthesis

Mesoporous silica materials were synthesized by slowly injecting TEOS to the NaOH solution of mixed surfactants and IPA. The molar composition of the synthesis mixture was 1.0 TEOS : 0.17 (CTAB + C<sub>12</sub>EO<sub>4</sub>) :  $x$  IPA : 0.4 NaOH : 1300 H<sub>2</sub>O, and the molar fraction of C<sub>12</sub>EO<sub>4</sub> in the surfactant mixture is denoted by  $f_n$ . The mixture was stirred at 35 °C for 24 h, further aged at 100 °C for 24 h, and was finally filtered and dried. The surfactants in the as-synthesized materials were removed by calcinations at 540 °C for 3 h. For the preparation of Pt-infiltrated samples, the silica (0.2 g) was impregnated with H<sub>2</sub>PtCl<sub>6</sub>·6H<sub>2</sub>O (0.36 g) and was heated to 200 °C in a stream of hydrogen to reduce the metal.

### Characterization methods

The XRD patterns were obtained with a CuK $\alpha$  X-ray source using a Mac Science 18MPX diffractometer. SEM images were obtained with a JEOL JSM-7000F microscope operated at 10 kV. TEM images were obtained using a JEOL JEM-2010 microscope operated at 200 kV. Gas physisorption isotherm was measured at 77 K using a Quantachrome Autosorb-1MP instrument. The pore diameter was evaluated by analyzing the desorption branch using the Barrett-Joyner-Halenda (BJH) method. The surface area was calculated from the adsorption branches in the relative pressure range of 0.05-0.20 by the Brunauer–Emmett–Teller (BET) method, and the pore volume was evaluated at a relative pressure of 0.8.

SAXS measurements were performed at the beamline 23A1 of National Synchrotron Radiation Research Center (NSRRC), Taiwan, using X-ray with photon energy of 10.0 keV. One-dimensional SAXS profiles were circularly averaged from 2D images obtained using a multi-wire area detector. The sample-to-detector distance was 1830 mm. The scattering wavevector  $q$ ,  $4\pi\sin(\theta)/\lambda$ , defined by the scattering angle  $2\theta$  and wavelength  $\lambda$ , was calibrated with silver behenate, and the scattering intensity  $I(q)$  was calibrated to the absolute intensity scale with a polyethylene sample. For SAXS measurements, the synthesis mixture obtained after the addition of TEOS was sucked out and quickly injected into a Kapton-sealed thin container, through which the X-ray beam passed, at different reaction time  $t$ . Besides, the solid products collected by quenching the synthesis immediately followed by filtration and drying at reaction time  $t$  were analyzed by SEM.

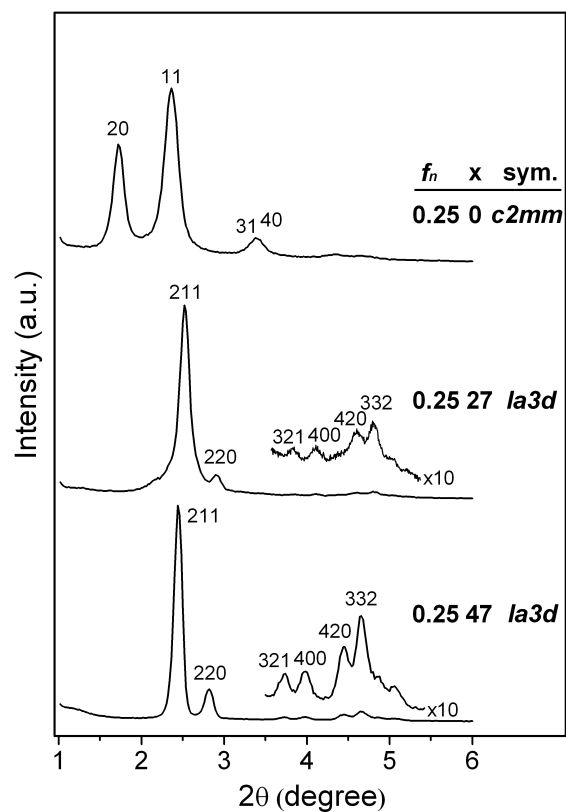

**Figure S1.** XRD patterns of the calcined samples with  $f_n = 0.25$  and  $x = 0, 27$  and  $47$ .

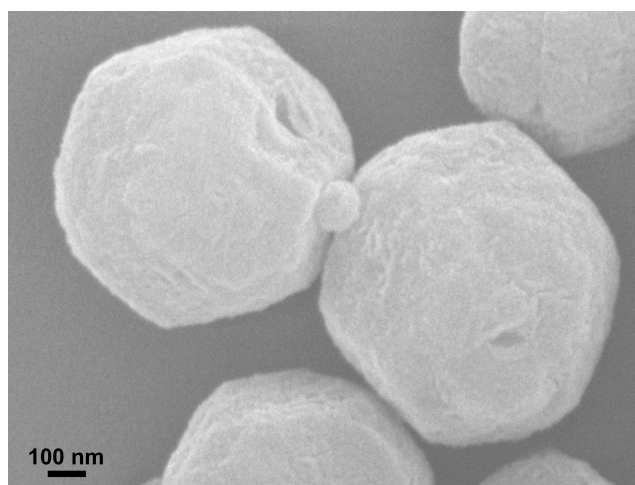

**Figure S2.** SEM image of the MCM-48 sample with  $f_n = 0.25$  and  $x = 47$ .

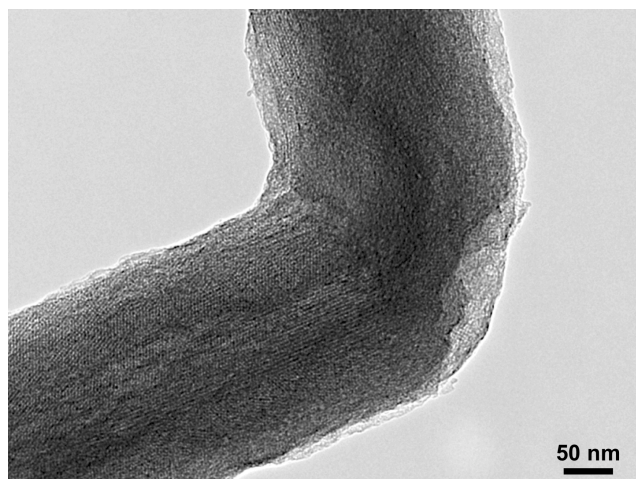

**Figure S3.** TEM image of MCM-48 nanorods at the joint of two arms.

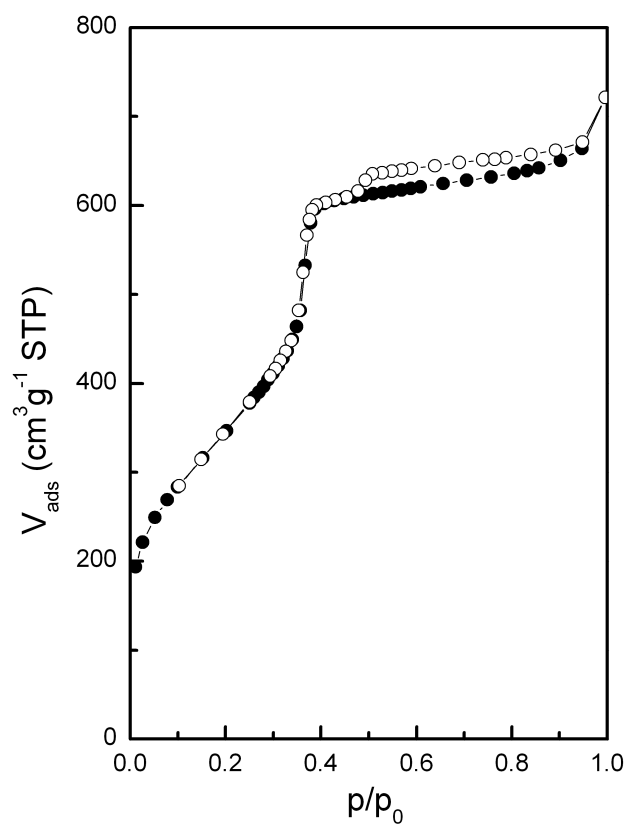

**Figure S4.** Nitrogen physisorption isotherm of MCM-48 nanorods.



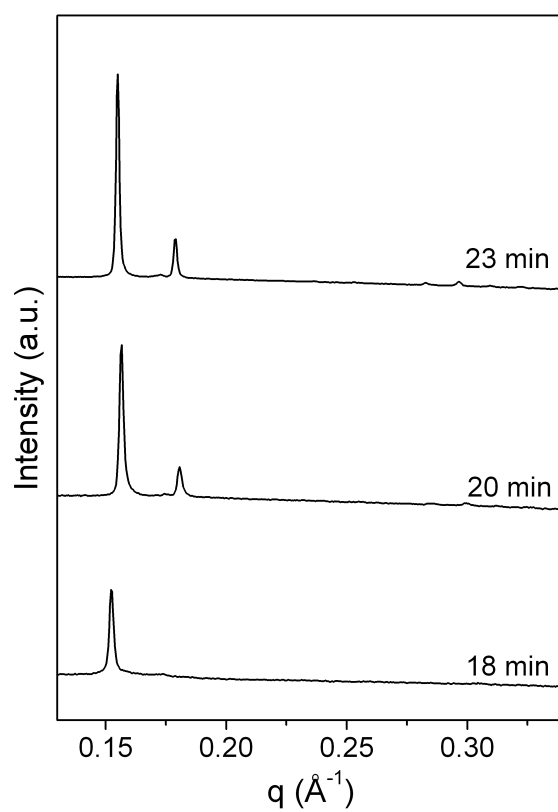

**Figure S5.** SAXS patterns of the synthesis mixture of MCM-48 nanospheres taken at different reaction times.
